# Supplementary material
Source: PubMed Central journal article supplement (PMC5790301)
Supplement: ry162447suppa1.pdf [file ry162447suppa1.pdf]

**Table E1: Typical Protocols for Myocardial MR Perfusion Imaging at the Two Participating Centers**

| Setting                                   | NIH                                            | Charité                          |
|-------------------------------------------|------------------------------------------------|----------------------------------|
| MR imager                                 | 1.5-T Avanto or Espree; Siemens Healthcare     | 1.5-T Avanto; Siemens Healthcare |
| MR sequence                               | True fast imaging with steady-state precession | Fast low-angle shot              |
| Parameter                                 |                                                |                                  |
| Repetition time (msec)                    | 2.3                                            | 2.2                              |
| Echo time (msec)                          | 1.1                                            | 1.08                             |
| Acquisition window (msec)                 | 92                                             | 77                               |
| Segments per heartbeat                    | Single shot (40 actual phase-encoding lines)   | 71                               |
| Saturation recovery inversion time (msec) | 70                                             | 120                              |
| Flip angle (degrees)                      | 50                                             | 12                               |
| Phase oversampling (%)                    | 0                                              | 25                               |
| No. of short-axis sections                | 3                                              | 3                                |
| Section thickness (mm)                    | 8                                              | 8                                |
| Section gap (%)                           | 100                                            | 100                              |
| Field of view (mm)                        | 360 × 270                                      | 360 × 270                        |
| Matrix                                    | 128 × 80                                       | 192 × 95                         |
| Pixel size (mm)                           | 2.8 × 3.4                                      | 1.9 × 2.8                        |
| PAT                                       | TPAT                                           | iPAT (GRAPPA)                    |
| PAT factor                                | 2                                              | 2                                |
| Contrast agent                            | Gadopentetate dimeglumine                      | Gadopentetate dimeglumine        |
| Concentration (mmol/kg)                   | 0.5                                            | 0.1                              |
| Flow (mL/sec)                             | 5                                              | 4–6                              |
| Stress induction                          | Intravenous regadenoson                        | Intravenous adenosine            |
| Infusion duration                         | Bolus                                          | 4 minutes 30 seconds             |
| Dose                                      | 0.4 mg                                         | 140 µg/kg/min                    |

Note.—GRAPPA = generalized autocalibrating partial parallel acquisition, iPAT = integrated parallel acquisition technique, NIH = National Institutes of Health, PAT – parallel acquisition technique, TPAT – temporal parallel acquisition technique.
